# Supplementary material for: Effects of different ascorbic acid doses on the mortality of critically ill patients: a meta-analysis
Source: Springer Nature journal article supplement (doi:10.1186/s13613-019-0532-9), 2019-05-20
Supplement: MOESM1 [file 16736460]

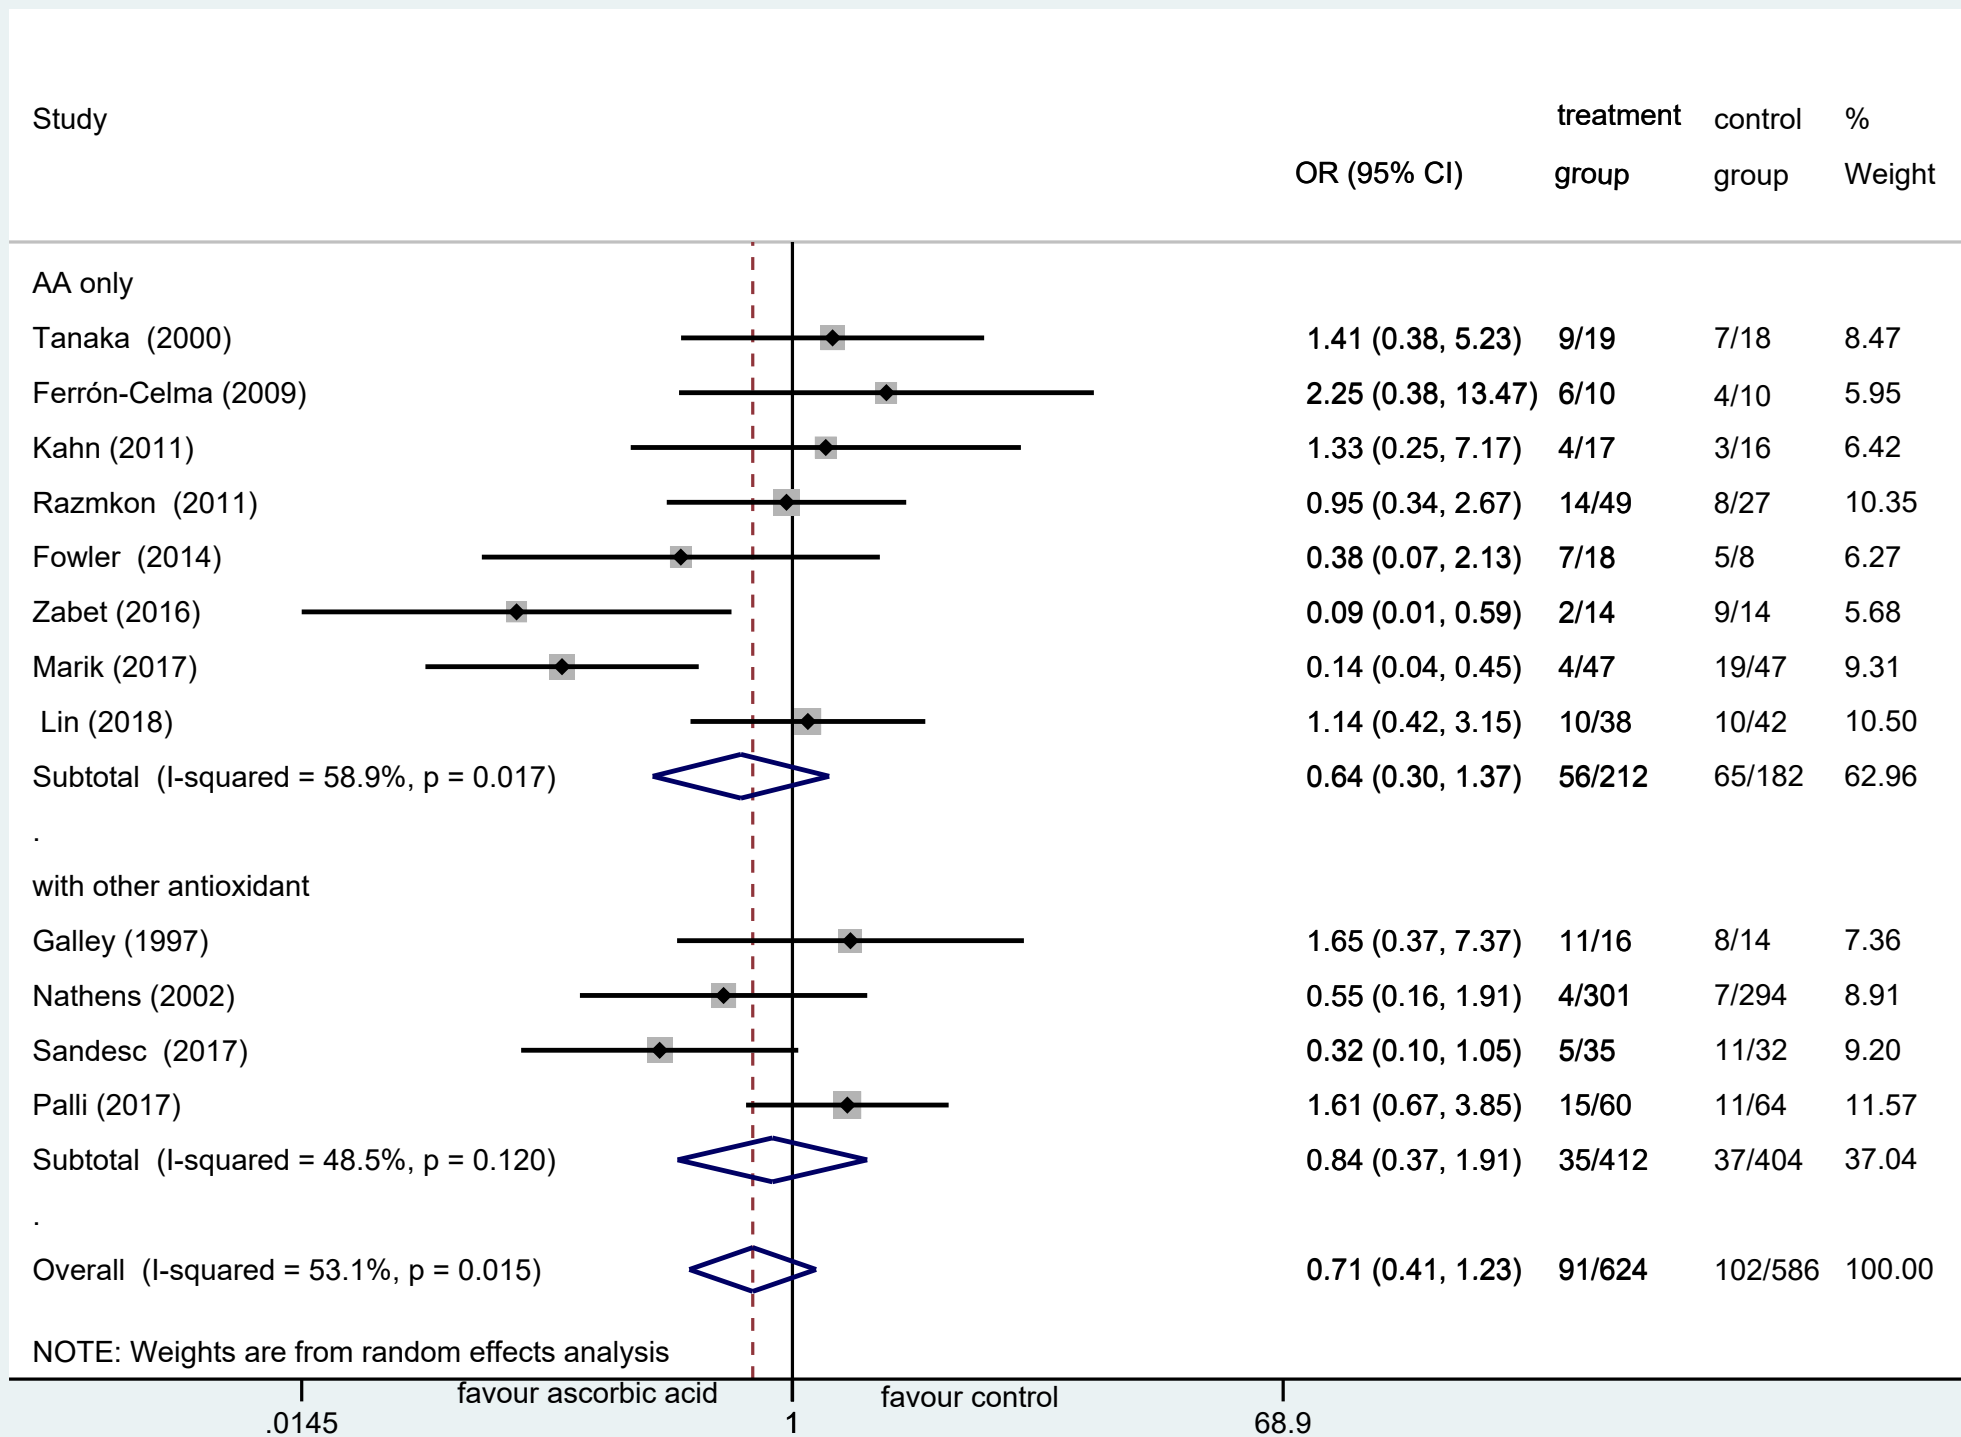

Fig S1: Forest plot of the effect of IV AA on mortality at the final follow-up when compared by administration of AA alone or in combination with other antioxidant agents
