# Supplementary material for: Effects of different ascorbic acid doses on the mortality of critically ill patients: a meta-analysis
Source: Springer Nature journal article supplement (doi:10.1186/s13613-019-0532-9), 2019-05-20
Supplement: MOESM4 [file 16736460]

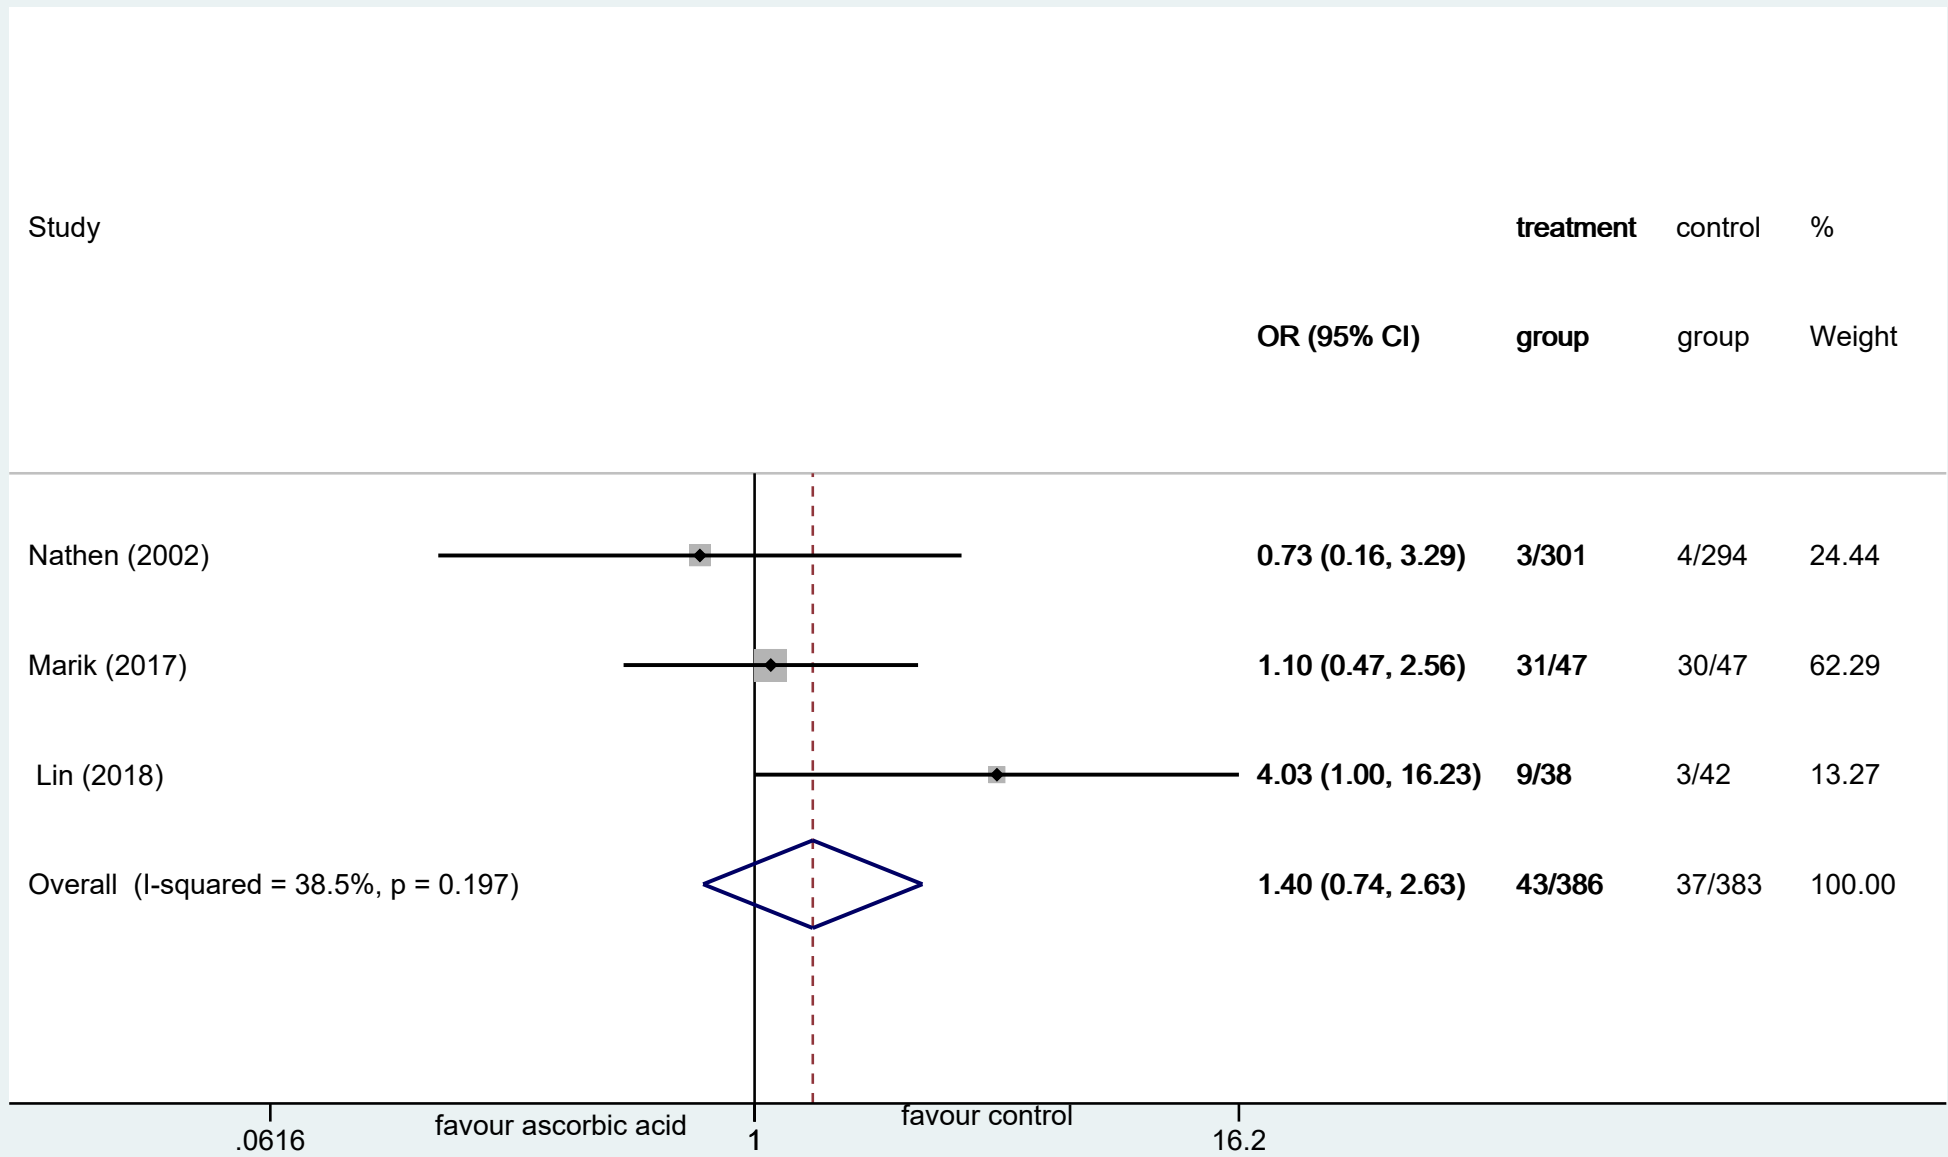

Fig S4: Forest plot of the effect of intravenous ascorbic acid administration on the number of patients suffered from AKI.
